# Supplementary material for: Ectomycorrhiza resilience and recovery to extreme flood events in Tuber aestivum and Quercus robur
Source: PubMed Central journal article supplement (PMC8266694; doi:10.1007/s00572-021-01035-4), 2021-05-13
Supplement: 572_2021_1035_MOESM1_ESM.pdf [file 572_2021_1035_MOESM1_ESM.pdf]

Electronic supplementary material

# **Ectomycorrhiza resilience and recovery to extreme flood events in *Tuber aestivum* and *Quercus robur***

Author; P. W. Thomas<sup>1,2,\*</sup>

Journal; *Mycorrhiza*

<sup>1</sup> *University of Stirling, Faculty of Natural Sciences, Stirling, FK9 4LA, UK.*

<sup>2</sup> *Mycorrhizal Systems Ltd, Lancashire, PR25 2SD, UK.*

\* *Corresponding author: paul.thomas@stir.ac.uk, +44(0) 333 2427831.*

**Table S1.** Details for the experimental groups used in this study. Dates are calculated from the start of the year, with the 1<sup>st</sup> of January 2016 being day 1 and, for example, the 25<sup>th</sup> of January 2016, being day 25. Note: all treatment groups were subject to analysis on the same dates and this resulted in group S1 having a greater recovery time from group S8 by 58 days.

| <b>Group</b> | <b>Submersion day</b> | <b>Days submerged</b> | <b>Analysis day</b> | <b>Recovery (days)</b> |
|--------------|-----------------------|-----------------------|---------------------|------------------------|
| S1           | 25                    | 7                     | 204-213             | 172-181                |
| S2           | 25                    | 15                    | 204-213             | 164-173                |
| S3           | 25                    | 23                    | 204-213             | 156-165                |
| S4           | 25                    | 31                    | 204-213             | 148-157                |
| S5           | 25                    | 39                    | 204-213             | 140-149                |
| S6           | 25                    | 49                    | 204-213             | 130-139                |
| S7           | 25                    | 57                    | 204-213             | 122-131                |
| S8           | 25                    | 65                    | 204-213             | 114-123                |

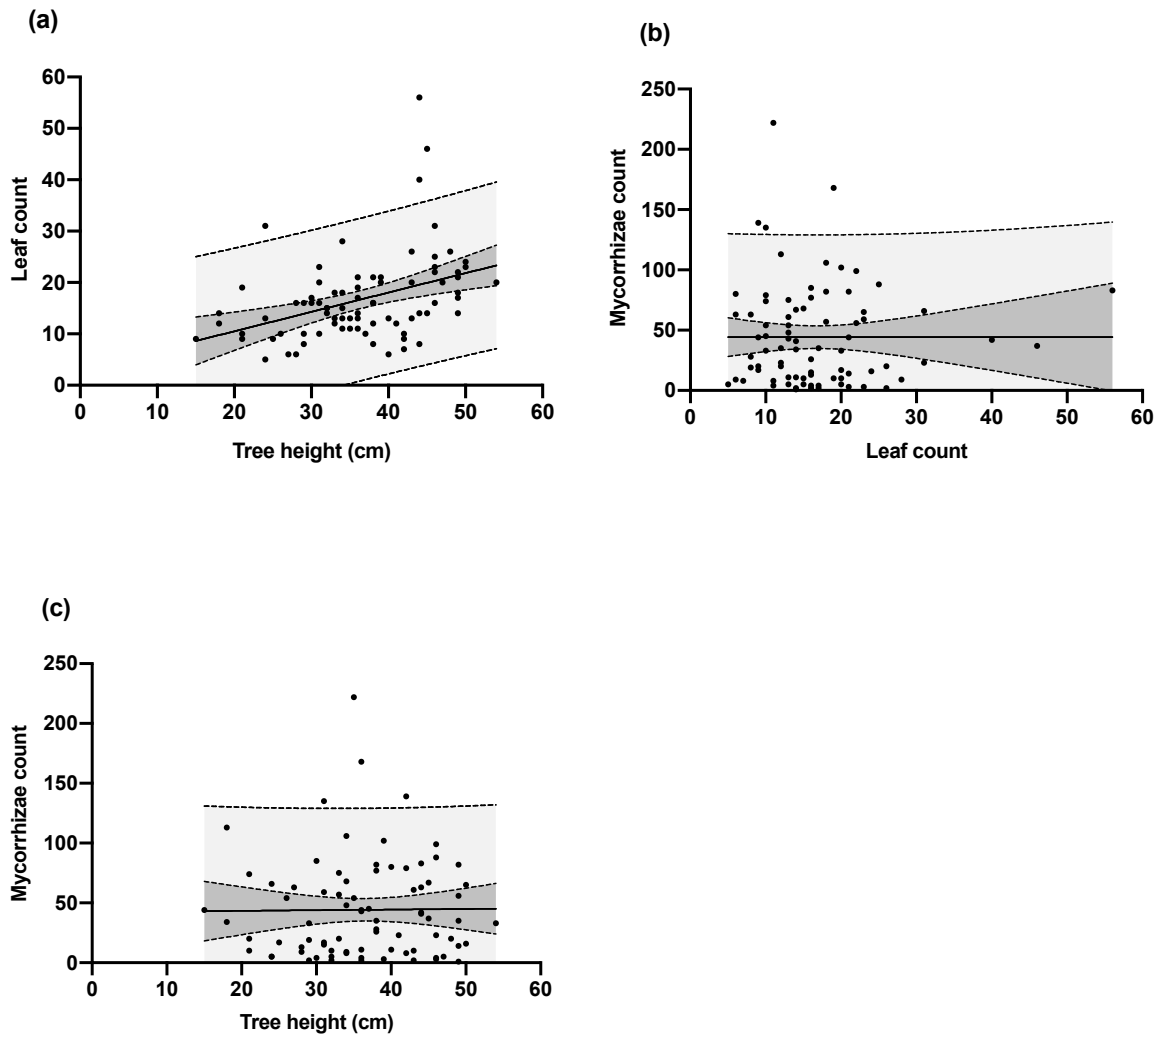

**Fig S1** Regression analysis of whole data showing leaf count plotted against tree height (a), total mycorrhizae count plotted against leaf count (b) and total mycorrhizae count plotted against tree height (c). Confidence level or range (95%) and predictive intervals are also displayed. Created with Prism 9 for macOS

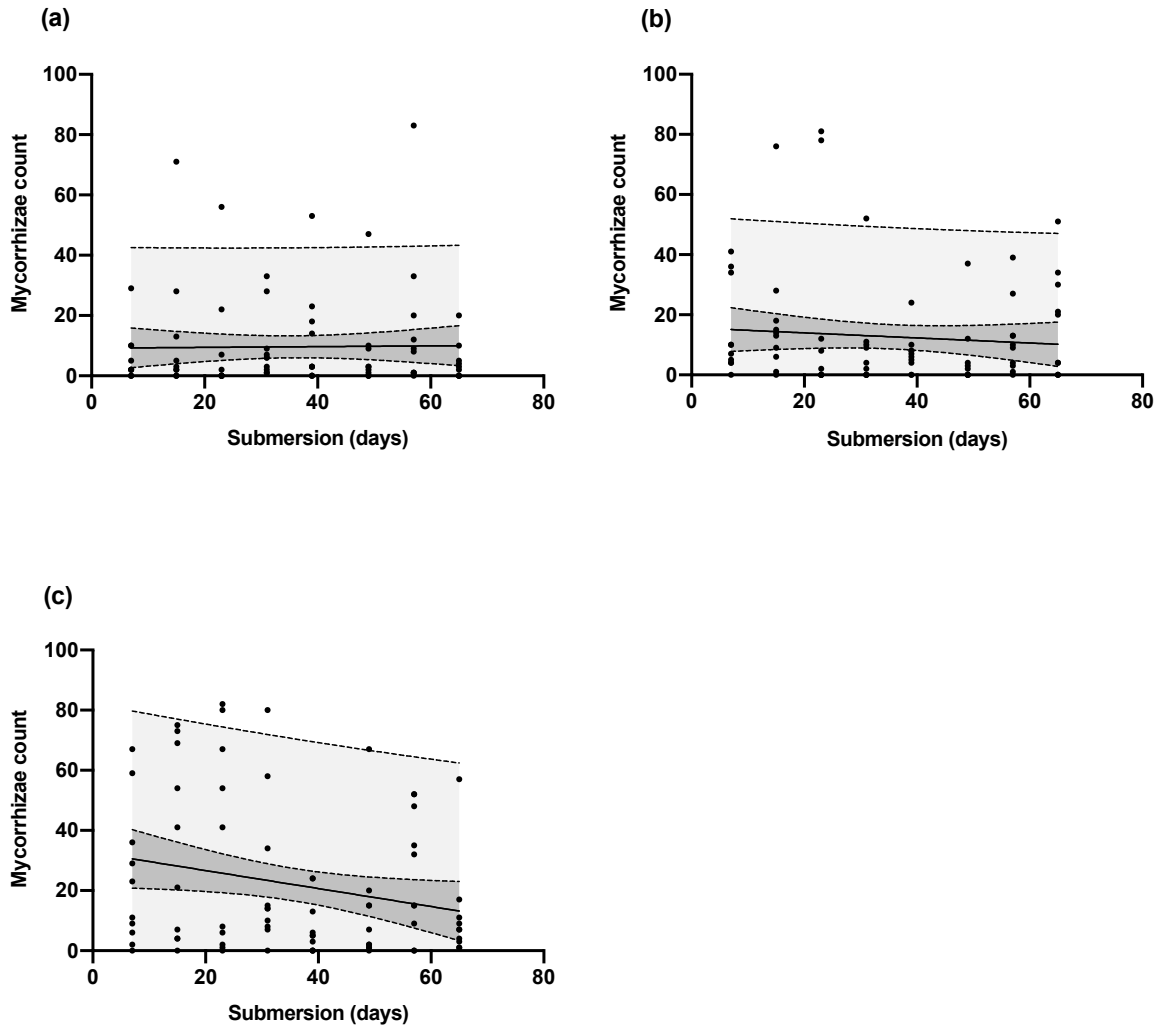

**Fig S2** Regression analysis of mycorrhizae counts for the top (a), middle (b) and bottom (c) root zones of treatment group plants, plotted against submersion time (days). Confidence level or range (95%) and predictive intervals are also displayed. Created with Prism 9 for macOS
